# Supplementary material for: First Insight into Diversity of Minisatellite Loci in Mycobacterium bovis/M. caprae in Bulgaria
Source: MDPI journal article supplement (doi:10.3390/diagnostics13040771), 2023-02-17
Supplement: s1 [file s1]

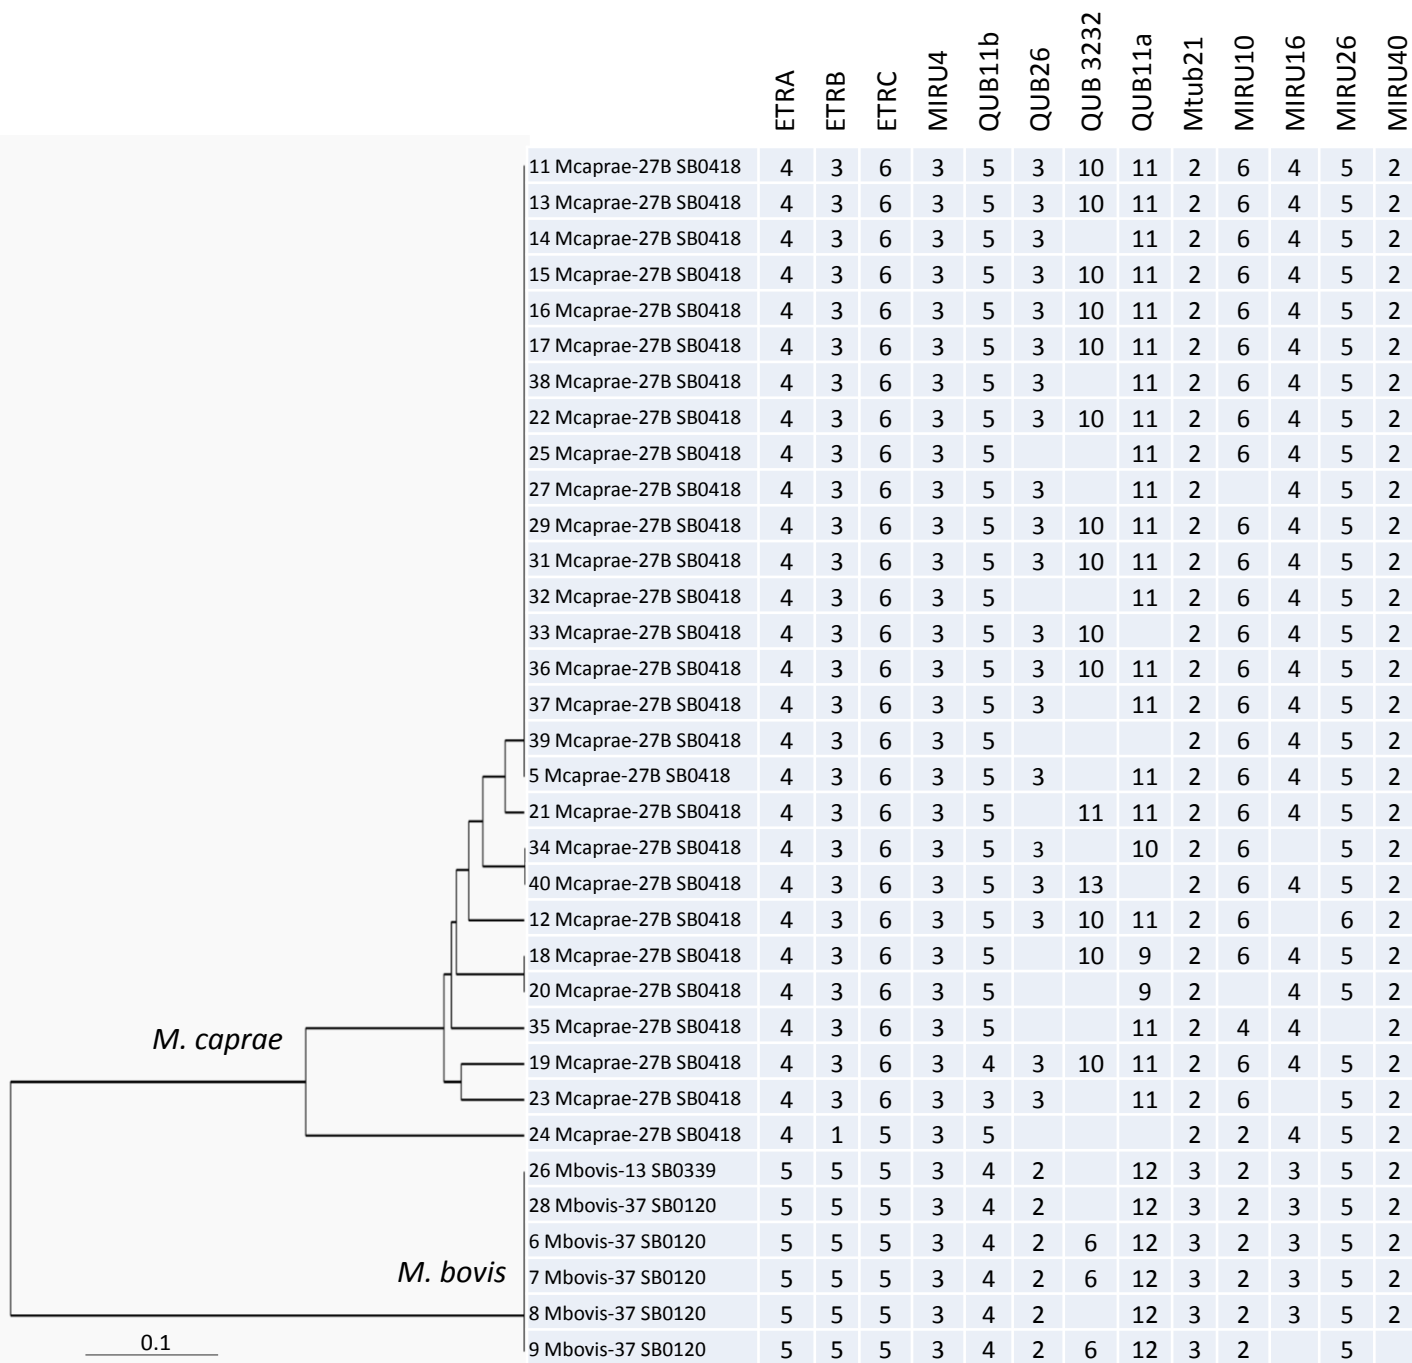

**Figure S3.** The 13-VNTR-loci UPGMA tree of 34 *M. bovis* isolates from Bulgaria with available WGS data. The WGS-based tree of the same isolates is shown in Fig. 2. ID includes information on strain number (in bold), followed by WGS-based group, and Spoligotype number in Mbovis.org.
