# Supplementary material for: First Insight into Diversity of Minisatellite Loci in Mycobacterium bovis/M. caprae in Bulgaria
Source: MDPI journal article supplement (doi:10.3390/diagnostics13040771), 2023-02-17
Supplement: s1 [file s1]

| ID                                       | MIRU2 | Mtub4 | ETRC | MIRU4 | MIRU40 | MIRU10 | MIRU16 | Mtub21 | MIRU20 | QUB11b | ETRA | Mtub29 | Mtub30 | ETRB | MIRU23 | MIRU24 | MIRU26 | MIRU27 | Mtub34 | QUB11a | Mtub39 | QUB26 | QUB4156 | QUB3232 |
|------------------------------------------|-------|-------|------|-------|--------|--------|--------|--------|--------|--------|------|--------|--------|------|--------|--------|--------|--------|--------|--------|--------|-------|---------|---------|
| ALGERIA-27 Cattle                        |       |       | 3    | 3     | 2      | 2      | 3      |        |        | 4      | 6    |        |        | 4    |        |        | 5      |        |        | 16     | 4      | 6     |         |         |
| CHN_6.n=15. Sika deer                    |       |       |      | 3     | 2      |        | 3      | 4      |        | 4      | 6    |        |        |      |        |        |        |        |        |        | 4      |       |         |         |
| MEX-19.n=1 Cattle                        |       |       |      | 3     |        |        |        |        |        | 4      | 7    |        |        | 5    |        |        | 5      |        |        | 10     | 5      | 6     |         |         |
| MOZ_80 Cattle                            |       |       | 5    | 3     | 2      | 2      | 2      | 3      |        | 4      | 7    |        |        | 5    |        |        | 5      |        |        |        | 5      | 6     |         |         |
| PT_M260 (n=6) Cattle red deer wild boar  |       |       | 5    | 3     |        |        |        |        |        | 4      | 4    |        |        | 5    |        |        | 5      |        |        | 11     |        | 4     |         |         |
| TUR1.n=6. Cattle                         |       |       | 5    | 3     | 2      | 2      | 3      | 1      |        | 4      | 4    |        |        | 5    |        |        | 5      |        |        |        | 4      |       |         |         |
| CHN_3.n=7. Sika deer                     |       |       |      | 3     | 5      |        | 3      | 1      |        | 4      | 1    |        |        |      |        |        |        |        |        |        | 6      |       |         |         |
| TUN_77 Human                             |       |       | 5    | 3     |        |        |        |        |        | 4      |      |        |        | 5    |        |        |        |        |        | 11     | 6      | 3     |         |         |
| BRA_9 Cattle                             |       |       |      | 3     | 2      | 2      | 3      | 3      |        | 3      | 6    |        |        | 4    |        |        | 5      |        |        |        | 3      |       |         |         |
| PT_M202 (n=1) wild boar                  |       |       | 4    | 3     |        |        |        |        |        | 3      | 6    |        |        | 4    |        |        | 5      |        |        | 11     |        | 4     |         |         |
| BRA_7 Cattle                             |       |       |      | 3     | 2      | 2      | 4      | 3      |        | 3      | 6    |        |        | 3    |        |        | 5      |        |        |        | 6      |       |         |         |
| PT_M126 (n=4) red deer wild boar         |       |       | 4    | 3     |        |        |        |        |        | 3      | 6    |        |        | 3    |        |        | 5      |        |        | 12     |        | 5     |         |         |
| CHN_2.n=9. Sika deer                     |       |       |      | 3     | 2      |        | 3      | 1      |        | 1      | 7    |        |        |      |        |        |        |        |        |        | 5      |       |         |         |
| PT_M190 (n=1) Cattle                     |       |       | 4    | 3     |        |        |        |        |        | 1      | 7    |        |        | 4    |        |        | 2      |        |        | 12     |        | 4     |         |         |
| BG15 Mbovis Cattle                       |       |       | 3    | 3     | 2      | 2      |        | 3      |        | 2      | 6    |        |        | 5    |        |        | 5      |        |        | 11     | 1      | 9     |         |         |
| TUR10.n=2. Cattle                        |       |       | 3    | 3     | 2      | 2      | 3      | 3      |        | 2      | 5    |        |        | 5    |        |        | 5      |        |        |        | 4      |       |         |         |
| BG11 Mcaprae Cattle                      |       |       | 4    | 3     | 2      |        |        | 2      |        | 4      | 4    |        |        | 3    |        |        | 5      |        |        | 11     | 3      |       |         |         |
| PT_M261 (n=37) Cattle red deer wild boar |       |       | 4    | 3     |        |        |        |        |        | 4      | 4    |        |        | 5    |        |        | 5      |        |        | 11     |        | 4     |         |         |
| PT_M266 (n=2) Cattle wild boar           |       |       | 4    | 3     |        |        |        |        |        | 4      | 4    |        |        | 4    |        |        | 5      |        |        | 11     |        | 4     |         |         |
| ALGERIA-5 Cattle                         |       |       | 5    | 3     | 2      | 2      | 3      |        |        | 2      | 7    |        |        | 5    |        |        | 5      |        |        | 10     | 6      | 6     |         |         |
| TUN_102.n=13 Human                       |       |       | 5    | 3     |        |        |        |        |        | 2      | 6    |        |        | 5    |        |        |        |        |        | 10     | 6      | 6     |         |         |
| ALGERIA-7 Cattle                         |       |       | 5    | 3     | 1      | 2      | 3      |        |        | 4      | 5    |        |        | 5    |        |        | 5      |        |        | 10     | 4      | 6     |         |         |
| MEX-23.n=1 Cattle                        |       |       |      | 3     |        |        |        |        |        | 4      | 5    |        |        | 5    |        |        | 5      |        |        | 10     | 4      | 7     |         |         |
| TUN_68.n=2 Human                         |       |       | 5    | 3     |        |        |        |        |        | 4      | 5    |        |        | 5    |        |        |        |        |        | 10     | 7      | 7     |         |         |

**Figure S2.** Parts of the global VNTR-based UPGMA tree of *M. bovis*/*M. caprae* isolates: clusters of identical isolates from different countries, and some pairs of related isolates discussed in the main text.

Loci within used 13-loci scheme are in bold. Abbreviations used in ID. BRA – Brazil, BG – Bulgaria, CHN – China, MEX – Mexico, MOZ – Mozambique, PT – Portugal, TUN – Tunisia, TUR – Turkey.
