# Supplementary material for: First Insight into Diversity of Minisatellite Loci in Mycobacterium bovis/M. caprae in Bulgaria
Source: MDPI journal article supplement (doi:10.3390/diagnostics13040771), 2023-02-17

ID includes country of origin, number of isolates, host.

Loci within used 13-loci scheme are in bold.

Abbreviations used in type ID. BRA – Brazil, BG – Bulgaria, CHN – China, ITA – Italy, MEX – Mexico, MOZ – Mozambique, PT – Portugal, TUN – Tunisia, TUR – Turkey, PL – Poland, SW – Switzerland.

The tree is based on data in Table S1.

Loci within used 13-loci scheme are in bold.  
Abbreviations used in type ID. BRA – Brazil, BG – Bulgaria, CHN – China, ITA – Italy, MEX – Mexico, MOZ – Mozambique, PT – Portugal, TUN – Tunisia, TUR – Turkey, PL – Poland, SW – Switzerland.  
The tree is based on data in Table S1.

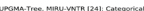

Supplement: s1 [file s1]
